# Supplementary material
Source: publisher figshare collection journal article supplement (https://gsajournals.figshare.com/ndownloader/files/13109783)
Supplement: Supplementary file 1 [file 13109783]

## Sheet: Sheet1
Table S2. SNPs of the 138 that were significant for LRT-1 where a polymorphisms was also observed in the Machado (columns E-H) or Signor (columns I-L) datasets. Mis-matches are color coded.
Chromosome r2.02	Position r2.02	Ref	Alt	Chromosome r2.01a	Position r2.01a	Ref	Alt	Chromosome r2.01b	Position r2.01b	Ref	Alt
Scf_2L	3862348	A	T	2L	3862448	A	T	2L	3862348	A	T
Scf_2L	3862350	T	A	2L	3862450	T	A	2L	3862350	T	A
Scf_2L	3921432	C	T	2L	3921532	C	T	2L	3921432	C	T
Scf_2L	9691228	T	A	2L	9691328	T	A	2L	9691228	T	A
Scf_2L	13898087	A	T	2L	13937154	A	T	2L	13937054	A	T
Scf_2L	21742348	A	G	2L	21783405	Not ascertained		2L	21783305	A	G
Scf_2R	2404114	G	A	2R	2404204	G	A	2R	2404114	G	A
Scf_2R	3205272	A	C	2R	3205362	A	C	2R	3205272	A	C
Scf_2R	6635052	T	G	2R	6635142	T	G	2R	6635052	T	G
Scf_2R	12942082	C	A	2R	12942172	C	A	2R	12942082	C	A
Scf_2R	12942083	T	G	2R	12942173	T	G	2R	12942083	T	G,A
Scf_2R	12942094	G	C	2R	12942184	G	C	2R	12942094	G	C
Scf_2R	15248177	T	A	2R	15293105	T	A	2R	15293015	Not ascertained
Scf_3L	7862072	T	C	3L	7862172	T	C	3L	7862072	T	C
Scf_3L	11278353	C	T	3L	11278453	C	T	3L	11278353	Not ascertained
Scf_3L	11278359	C	G	3L	11278459	C	G	3L	11278359	Not ascertained
Scf_3L	11278362	A	T	3L	11278462	A	T	3L	11278362	Not ascertained
Scf_3L	23030585	T	A	3L	23132075	T	A	3L	23131975	T	A
Scf_3L	23161028	C	G	3L	23262518	C	T	3L	23262418	C	T,G
Scf_3L	23752433	T	C	3L	23853923	Not ascertained		3L	23853823	T	C
Scf_3L	23761617	G	C	3L	23863107	Not ascertained		3L	23863007	G	A
Scf_3L	24056190	G	T	3L	24157680	Not ascertained		3L	24157580	G	T
Scf_3R	14055827	G	A	3R	14055927	G	A	3R	14055827	Not ascertained
Scf_3R	15971225	T	A	3R	15971325	T	A	3R	15971225	T	A
Scf_3R	16961782	T	A	3R	16961882	T	A	3R	16961782	T	A,TATA,TATACTATA
Scf_X	2825727	T	G	X	2825825	T	G	X	2825727	T	G
Scf_X	4273251	T	A	X	4273349	Not ascertained		X	4273251	T	A
Scf_X	7872843	T	A	X	7884466	T	A	X	7884368	T	A
Scf_X	9051688	T	A	X	9063311	T	A	X	9063213	Not ascertained
Scf_X	10550413	A	G	X	10562036	A	G	X	10561938	A	G
Scf_X	11357723	T	G	X	11369346	T	G	X	11369248	T	G
Scf_X	14713468	T	C	X	14725091	T	C	X	14724993	T	C
Scf_X	16106571	C	G	NODE_84375_length_132_cov_58.780304	2	Not ascertained		X	16118096	C	A
Scf_X	16106745	C	A	X	16118368	C	A	X	16118270	Not ascertained
Scf_X	16291700	A	G	X	16303323	A	G	X	16303225	A	G
Scf_X	16291875	T	C	X	16303498	T	C	X	16303400	T	C
Scf_X	16292310	C	T	X	16303933	C	T	X	16303835	C	T
Scf_X	20561008	T	A	X	20572631	Not ascertained		X	20572533	T	A
